# Supplementary figures and images for: PARP Inhibitor Decreases Akt Phosphorylation and Induces Centrosome Amplification and Chromosomal Aneuploidy in CHO-K1 Cells
Source: MDPI journal article supplement (doi:10.3390/ijms23073484), 2022-03-23

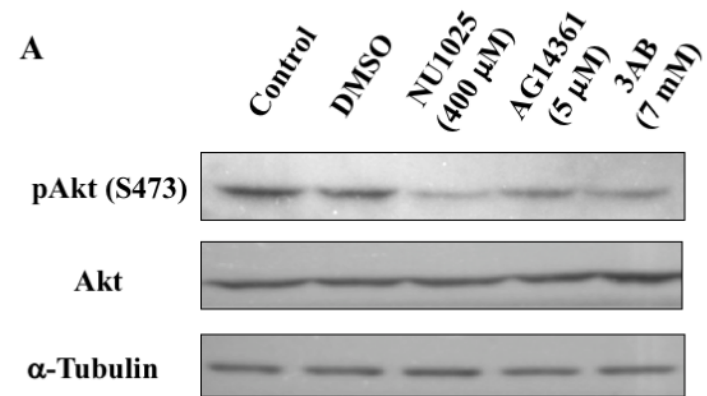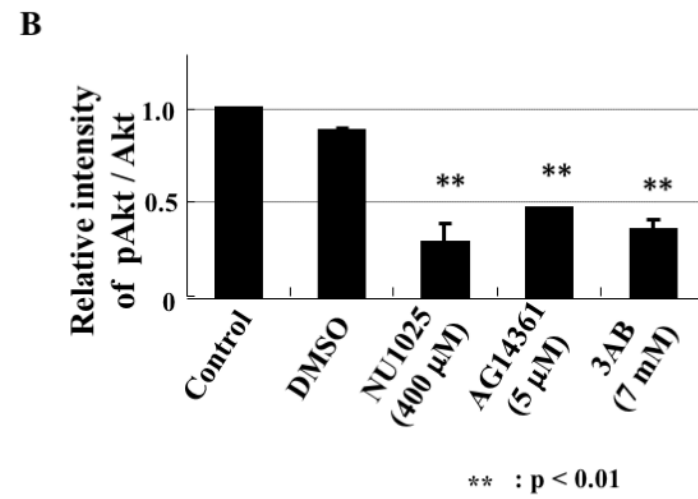

Supplement: s1 [file s1]
